# Supplementary material for: A metal-organic framework@hydrogen-bond framework as a matrix for MALDI-TOF-MS analysis of small molecules
Source: Royal Society of Chemistry journal article supplement (doi:10.1039/d2cc02206k), 2022-01-01
Supplement: d2cc02206k1.pdf [file d2cc02206k1.pdf]

**Electronic supplementary information**

**Metal-organic framework @ hydrogen-bond framework as matrix for MALDI-**

**TOF-MS analysis of small molecules**

Shi-Jun Yin <sup>a</sup>, Guo-Can Zheng <sup>b</sup>, Xin Yi <sup>c</sup>, Guang-ping Lv <sup>c</sup>, Feng-Qing Yang <sup>a\*</sup>

<sup>a</sup> Department of Pharmaceutical Engineering, School of Chemistry and Chemical Engineering, Chongqing University, Chongqing 401331, China

<sup>b</sup> Analytical and Testing Center, Chongqing University, Chongqing 401331, China

<sup>c</sup> School of Food Science and Pharmaceutical Engineering, Nanjing Normal University, Nanjing 210023, China

\*Prof. Dr. Feng-Qing Yang, School of Chemistry and Chemical Engineering, Chongqing University, Chongqing 400030, China. Phone number: +8613617650637.

E-mail: fengqingyang@cqu.edu.cn

## Table of contents

### Supplementary Tables

**Table S1.** Method validation using MOF@HOF as a matrix for the direct analysis of three flavonoids by MALDI-TOF-MS

**Table S2.** Analytical performance for the determination of the investigated flavonoids by the developed HPLC method

**Table S3.** The linear relationship and parameters of Langmuir and Freundlich adsorptions

**Table S4.** Method validation using MOF@HOF as an adsorbent and matrix for the analysis of three flavonoids by MALDI-TOF-MS

**Table S5.** Determination of three flavonoids in kumquat and honey orange by MALDI-TOF-MS using MOF@HOF as an adsorbent and matrix

### Supplementary Figures

**Fig. S1.** Chemical structures of selected flavonoids.

**Fig. S2.** The background mass spectra of MOF@HOF composite and traditional matrix.

**CHCA**,  $\alpha$ -cyano-4-hydroxycinnamic acid; **DHB**, 2, 5-dihydroxybenzoic acid; **MOF@HOF**, metal-organic framework @ hydrogen-bond framework; **SA**, sinapic acid; **THAP**, 2, 4, 6-trihydroxyacetophenone.

**Fig. S3.** The calibration curves of (a) TAN, (b) HES, and (c) NAR using MOF@HOF as a matrix for the direct MALDI-TOF-MS analysis, based on the intensity of TAN ( $[M+H]^+$  at  $m/z$  373), HES ( $[M+K]^+$  at  $m/z$  341), and NAR ( $[M+K]^+$  at  $m/z$  311); (d–i) Mass spectra of mixed reference compounds in the concentrations of 25–200  $\mu\text{g/mL}$ . **HES**, hesperetin; **NAR**, naringenin; **TAN**, tangeretin.

**Fig. S4.** The calibration curves of investigated flavonoids determined by HPLC using MOF@HOF as an adsorbent. **HES**, hesperetin; **NAR**, naringenin; **TAN**, tangeretin.

**Fig. S5.** (a) Adsorption isotherms and (b) adsorption kinetics of TAN, HES, and NAR using MOF@HOF as an adsorbent. **TAN**, tangeretin; **HES**, hesperetin; **NAR**,

47 naringenin.

48 **Fig. S6.** Langmuir (**a, c, e**) and Freundlich (**b, d, f**) isotherm adsorption model curves  
49 of three flavonoids. **HES**, hesperetin; **NAR**, naringenin; **TAN**, tangeretin.

50 **Fig. S7.** Mass spectra and corresponding chemical structures of amino acids ((**a**) L-  
51 histidine, (**b**) D-phenylalanine, and (**c**) L-arginine), antihypertensive drugs ((**d**)  
52 captopril, (**e**) alprenolol, and (**f**) diltiazem), non-steroid anti-inflammatory drug ((**g**)  
53 acetaminophen, (**h**) ketoprofen, and (**i**) sulindac), coumarins ((**j**) psoralen, (**k**)  
54 bergapten, and (**l**) imperatorin). The amino acids were dissolved in ultrapure water and  
55 the other compounds were dissolved in acetonitrile. The concentration of all analytes is  
56 100 µg/mL for direct analysis.

57 **Fig. S8.** MALDI-TOF-MS spectra of 100 µg/mL of tangeretin analyzed using  
58 MOF@HOF as a matrix in positive ion mode with addition of 0, 20, 40, 60, 80, and  
59 100 mM of NaCl.

60 **Fig. S9.** Optical images of different matrix (2 mg/mL) dispersed on the stainless-steel  
61 targets. **CHCA**,  $\alpha$ -cyano-4-hydroxycinnamic acid; **DHB**, 2, 5-dihydroxybenzoic acid;  
62 **MOF@HOF**, metal-organic framework @ hydrogen-bond framework; **SA**, sinapic  
63 acid; **THAP**, 2, 4, 6-trihydroxyacetophenone.

64 **Fig. S10.** (**a**) Repeatability and (**b**) storage stability test of MOF@HOF composite,  
65 based on the intensity of tangeretin ( $[M+H]^+$  at  $m/z$  373).

66 **Fig. S11.** The XRD spectra of (**a**) ZIF-8, (**b**) ZIF-67, (**c**) NH<sub>2</sub>-MIL-101, and (**d**) NH<sub>2</sub>-  
67 MIL-125.

68 **Fig. S12.** MALDI-MS imaging analysis of the NAR, HES, and TAN distribution in the  
69 peel tissue of (**a**) kumquat and (**b**) honey orange. **TAN**, tangeretin; **HES**, hesperetin;  
70 **NAR**, naringenin.

71

## 72 **Supplementary Methods**

### 73 **Materials and reagents**

74 Ferric chloride hexahydrate ( $\text{FeCl}_3 \cdot 6\text{H}_2\text{O}$ , >98%), acetic acid (>99%), tetra-*n*-butyl  
75 titanate ( $\geq 98\%$ ), sodium chloride ( $\text{NaCl}$ ,  $\geq 99.5\%$ ), trifluoroacetic acid ( $\geq 99\%$ ), *N,N*-  
76 dimethyl formamide (DMF,  $\geq 99.5\%$ ), *N,N*-dimethylacetamide (DMA, >99%), and  
77 formic acid (FA, >99.5%) were purchased from Chengdu Chron Chemicals Co., Ltd.  
78 (Sichuan, China) (<http://www.chronchem.com/en/>). The 1H-1,2,4-triazole-3,5-diamine  
79 (DAT, >98.0%) and acetonitrile (ACN, HPLC-grade) were purchased from Adamas-  
80 beta (Shanghai, China) (<http://www.adamas-beta.com>). Naphthalene-1,4,5,8-  
81 tetracarboxylic dianhydride (NTD, >98.0%) and 2-methylimidazole (98%) were  
82 purchased from Tokyo Chemical Industry Co., Ltd. (Tokyo, Japan)  
83 (<https://tokyochemical.lookchem.com/>). 2-aminoterephthalic acid (AMAC,  $\geq 98\%$ )  
84 were purchased from Shanghai DiBai Biological Technology Co., Ltd. (Shanghai,  
85 China) (<http://www.chemxyz.com/>). Zinc acetate dihydrate ( $\text{Zn}(\text{AC})_2 \cdot 2\text{H}_2\text{O}$ , 99%),  
86 cobalt chloride hexahydrate ( $\text{CoCl}_2 \cdot 6\text{H}_2\text{O}$ , 99%) were purchased from Macklin  
87 (Shanghai, China) (<http://www.macklin.cn/>). L-histidine, D-phenylalanine, and L-  
88 arginine were purchased from TargetMol, (USA) ([www.targetmol.com](http://www.targetmol.com)). Imperatorin  
89 (>98%), tangeretin ( $\geq 98\%$ ), naringenin (>98%), and hesperetin ( $\geq 98\%$ ) were purchased  
90 from Chengdu Herb Substance Co., Ltd. (Sichuan, China)  
91 (<https://www.herbsubstance.com/>). Captopril (>99%), atenolol (>99%), and diltiazem  
92 (>99%) were purchased from Dalian Meilun Biological Technology Co., Ltd.  
93 (Liaoning, China) (<http://www.meilune.com/>). Polyvinyl pyrrolidone (PVP,  
94 MW=40000), acetaminophen ( $\geq 99\%$ ), ketoprofen ( $\geq 99\%$ ), and sulindac ( $\geq 99\%$ ) were  
95 purchased from Shanghai YuanYe Biological Technology Co., Ltd. (Shanghai, China)  
96 (<http://yuanyebio.bioon.com.cn/>). Psoralen (>98%) and bergapten ( $\geq 98\%$ ) were  
97 purchased from Chengdu DeSiTe Biological Technology Co., Ltd. (Sichuan, China)  
98 (<http://cddesite.foodmate.net/>). The  $\alpha$ -cyano-4-hydroxycinnamic acid (CHCA,  $\geq 98\%$ ),  
99 zirconium (IV) chloride ( $\geq 99.9\%$ ) and 2,5-dihydroxyterephthalic acid ( $\geq 98\%$ ) were  
100 purchased from Shanghai Aladdin Biochemical Technology Co., Ltd. (Shanghai,

China) (<https://www.aladdin-e.com/>). The chemical structures of selected flavonoids are shown in Fig. S1. Water used for all the experiments was purified by a water purification system (ATSelem 1820A, Antesheng Environmental Protection Equipment Co., Ltd., Chongqing, China) (<http://www.atshb.com/>).

## Characterization of the synthesized materials

Scanning electron microscopy (SEM) images were obtained using a field-emission scanning electron microscope (FESEM) (Quanta 650, FEI, Hillsboro, OR, <https://www.fei.com>) at 20 kV. Transmission electron microscopy (TEM) images and element distribution analysis were recorded using a JEM 2100 (JEOL Ltd. Tokyo, Japan, <https://www.jeol.co.jp/en/>) electron microscope working at 200 kV equipped with energy dispersive X-ray spectrometer (EDX). Thermogravimetric analysis (TGA) was carried out on Mettler TGA/DSC1/1600LF (Mettler-Toledo AG, Analytical, Switzerland, <https://www.mt.com/cn/zh/home.html>) from 30°C to 1000°C at a heating rate of 10°C min<sup>-1</sup> in N<sub>2</sub> gas flow. Fourier transform infrared spectra (FT-IR) were taken on a Bruker Tensor 27 spectrometer (Bruker, USA, <https://www.bruker.com/>) between 4000 cm<sup>-1</sup> and 400 cm<sup>-1</sup> in KBr media. X-ray diffraction (XRD) patterns were obtained using X'pert Powder diffractometer (Malvern Panalytical Ltd., Netherlands, <https://www.malvernpanalytical.com/en/>) with secondary beam graphite monochromated Cu K $\alpha$  radiation. X-ray photoelectron spectrometer (XPS) were recorded on a PHI5000 Versaprobe system using monochromatic Al K $\alpha$  radiation (1486.6 eV), and the obtained binding energies were referenced to the C 1s line set at 284.8 eV. Nitrogen sorption studies were carried out using a Quadrasorb 2MP (Quantachrome, US, <http://quanta.cnpowder.com.cn>) specific surface and aperture analyzer. Before the adsorption measurements, the samples were activated under vacuum at 50°C for 24 h.

## Preparation of MOF@HOF composite

UiO-66-(OH)<sub>2</sub> was synthesized according to the previous report with some modifications [1]. Typically, ZrCl<sub>4</sub> (420 mg), H<sub>2</sub>BDC-(OH)<sub>2</sub> (357 mg), and PVP (400

129 mg,  $M_w = 40000$ ) were dissolved into a mixed solution (DMF/ultra-pure water/acetic  
130 acid = 27/1/25.6, v/v/v, 60 mL). The mixture was sonicated for 20 min, placed in a 100  
131 mL Teflon-lined hydrothermal reaction kettle and heated at 120°C for 2 h. The material  
132 was collected by centrifugation ( $6790 \times g$ , 15 min) and washed repeatedly with fresh  
133 DMF (20 mL) and methanol (20 mL) for three times, respectively. Finally, the product  
134 was dried under vacuum at 60°C for 12 h.

135 The MOF@HOF composite was synthesized through a solvothermal reaction. In  
136 brief, DAT (99.1 mg) and NTD (134 mg) were dispersed in DMA (20 mL), the mixture  
137 was sonicated for 5 min and followed by magnetically stirring for 1 h to obtain a  
138 homogenous solution under  $N_2$  in an ice bath. Subsequently, UiO-66-(OH)<sub>2</sub> (100 mg)  
139 was dispersed in DMA (25 mL) and added into the above mixture, and stirred to mix  
140 well. Then, the mixture was placed in a 50 mL Teflon-lined hydrothermal reaction  
141 kettle and heated at 180°C for 12 h. The obtained product (MOF@HOF) was separated  
142 by centrifugation ( $6790 \times g$ , 15 min), washed alternately with DMA (20 mL) and ACN  
143 (20 mL) for three times. Finally, the product was dried under vacuum at 50°C for 12 h.  
144

#### 145 **Preparation of NH<sub>2</sub>-MIL-101**

146 NH<sub>2</sub>-MIL-101 was prepared according to previous report with minor modifications [2].  
147 FeCl<sub>3</sub>·6H<sub>2</sub>O (4 mM), acetic acid (3.6 mL) and 2-aminoterephthalic acid (4 mM) were  
148 added and dispersed in DMF (90 mL) under sonication for 1.0 h. Then, the mixture was  
149 transferred to in a Teflon-lined autoclave and heated to 110 °C for 24 h. The obtained  
150 product was washed with DMF (2 × 50 mL) and ethanol (2 × 50 mL), and dried under  
151 vacuum at 60 °C for 12 h. The XRD result was shown in [Fig. S11a](#).

#### 152 **Preparation of NH<sub>2</sub>-MIL-125**

153 The NH<sub>2</sub>-MIL-125 was prepared according to previous report with minor modifications  
154 [3]. 2-aminoterephthalic acid (10.0 mM) and tetra-*n*-butyl titanate (5.0 mM) were added  
155 and dispersed in mixture solution (50 mL DMF and 5 mL MeOH) under sonication for  
156 30 min. Then, the mixture was transferred to in a Teflon-lined autoclave and heated to  
157 150 °C for 72 h. The obtained product was washed with DMF (2 × 50 mL) and ethanol

158 (2 × 50 mL), and dried under vacuum at 60 °C for 12 h. The XRD result was shown in  
159 [Fig. S11b](#).

#### 160 **Preparation of ZIF-8**

161 The ZIF-8 was prepared according to previous report with minor modifications [4].  
162 Zn(AC)<sub>2</sub>·2H<sub>2</sub>O (351 mg) and 2-methylimidazole (2627 mg) were added and dispersed  
163 in H<sub>2</sub>O (48 mL) under sonication for 5 min. Then, the mixture was transferred to a  
164 beaker and heated to 30 °C for 11 h. The obtained product was washed with deionized  
165 water (3 × 10 mL) and dried under vacuum at 50 °C for 12 h. The XRD result was  
166 shown in [Fig. S11c](#).

#### 167 **Preparation of ZIF-67**

168 The ZIF-67 was prepared according to previous report with minor modifications [5].  
169 CoCl<sub>2</sub>·6H<sub>2</sub>O (519 mg), PVP (600 mg), and 2-methylimidazole (2630 mg) were added  
170 and dispersed in MeOH (80 mL) under sonication for 5 min. Then, the mixture was  
171 transferred to a beaker and heated to 30 °C for 12 h. The obtained product was washed  
172 with MeOH (3 × 10 mL) and dried under vacuum at 50 °C for 12 h. The XRD result  
173 was shown in [Fig. S11d](#).

#### 174 **Adsorption experiments**

175 To investigate the adsorption capacity of the MOF@HOF composite, equilibrium and  
176 kinetic adsorption experiments were carried out. For equilibrium experiment, 1.0 mg of  
177 adsorbent was dispersed in the mixed reference compounds solution (12.5–200 µg/mL)  
178 with ultrasonication, and the mixture was shaken on a temperature-controlled air bath  
179 shaker (SHZ-82, Jintan Zhengrong Experimental Instrument Factory, Jiangsu, China)  
180 at 180 rpm for 25 min under 30°C to acquire adsorption equilibrium. Subsequently, the  
181 equilibrium solution was filtered through a 0.22 µm filter (Shanghai Titan Scientific,  
182 Shanghai, China) before HPLC analysis. For kinetic adsorption experiment, 1.0 mg of  
183 adsorbent was suspended in 1.0 mL of 50 µg/mL of mixed reference compounds  
184 solution. The mixtures were continuously shaken for different time (2–30 min) and the  
185 concentrations of supernatant were determined. The adsorption capacity of flavonoid  
186 was calculated by the following equation.

$$Q_e = \frac{(C_o - C_e)V}{m}$$

Where  $Q_e$  (mg/g) is the adsorption capacity of the adsorbent at equilibrium;  $C_o$  and  $C_e$  ( $\mu\text{g/mL}$ ) represent the initial and equilibrium solution concentration, respectively;  $V$  (L) is the volume of the mixed reference compounds solution; and  $m$  (g) is the weight of adsorbent added to the solution.

## Chromatographic conditions

HPLC analysis was performed on an Agilent 1260 Series liquid chromatography system (Agilent Technologies, Palo Alto, California, USA), which was equipped with a vacuum degasser, a binary pump, an auto-sampler, and a diode array detector, and was controlled by the Agilent ChemStation software. An Agilent ZORBAX SB-C18 column ( $150 \times 4.6$  mm i.d.,  $5 \mu\text{m}$ ) and a pre-column (ZORBAX SB-C18 guard column,  $12.5 \times 4.6$  mm i.d.,  $5 \mu\text{m}$ ) was employed to separate HES, NAR, and TAN. The mobile phase consists of formic acid-water (1:1000, v/v) (A) and acetonitrile (B) with gradient elution as follows: 0–10 min, 75%–30% B; 10–11 min, 30% B; 11–12 min, 30%–75% B; 12–20 min, 75% B. The flow rate of mobile phase was 1.0 mL/min, detection wavelength was at 280 nm, and injection volume was 5  $\mu\text{L}$  and column temperature was controlled at 35°C.

## Validation of the developed HPLC method

The stock solution containing the three reference compounds, including 1.0 mg/mL of NAR, HES, and TAN, were prepared with ACN and stored in a brown volumetric flask at 4°C. To establish the calibration curves, the stock solution was diluted to appropriate concentrations (12.5–200.0  $\mu\text{g/mL}$ ). Different concentrations of three reference compounds were injected and analyzed in triplicate. The calibration curves are peak areas versus the concentrations of each compound. The limit of detection (LOD) was determined as a signal-to-noise ratio equal to 3, and the limit of quantification (LOQ) was determined as a signal-to-noise ratio equal to 10. The precision was evaluated by intra-day and inter-day variability. Intra-day reproducibility was carried out by analyzing the individual sample solution six times within one day. Inter-day variability

215 was carried out by analyzing sample solution six times in three consecutive days.

#### 216 **Using MOF@HOF as an adsorbent and matrix**

217 A 0.1 mL MOF@HOF dispersed solution was added into a 2-mL centrifuge tube  
218 containing 0.9 mL of tested sample solution, and shaken on a temperature-controlled  
219 air bath shaker (SHZ-82, Jintan Zhengrong Experimental Instrument Factory, Jiangsu,  
220 China) at 150 rpm for 25 min under 40°C to acquire adequate adsorption. Then, the  
221 material was separated by centrifugation at  $4316 \times g$  for 5 min and re-dispersed in 50  
222  $\mu\text{L}$  of ACN under ultrasonication. A 1  $\mu\text{L}$  of solution was dropped onto the MALDI  
223 stainless steel plate and dried at room temperature before MALDI-TOF MS analysis.

#### 224 **Sample preparations**

225 The stock solutions (1.0 mg/mL) of amino acids (L-histidine, D-phenylalanine, and L-  
226 arginine) were prepared by dissolving them in water, and the other analytes, including  
227 HES, NAR, TAN, captopril, alprenolol diltiazem, acetaminophen, ketoprofen, sulindac,  
228 psoralen, bergapten, and imperatorin were prepared by dissolving their reference  
229 compounds in ACN. These solutions were freshly prepared and use (diluted to the  
230 desired concentration) within three days.

231 The traditional matrices, including CHCA, DHB, SA, and THAP, were prepared  
232 as saturated solutions in ACN/water (1:1, v/v) containing 0.1% of trifluoroacetic acid  
233 at the final concentration of 10 mg/mL. The MOF@HOF matrix was dispersed in ACN  
234 to form a homogeneous solution at the concentration of 2 mg/mL.

235 The 1.2 g of kumquat (*Fortunella margarita*, Guangxi, China) and honey orange  
236 (*Citrus sinensis*, Guangxi, China) peels were accurately weighed and placed in a 50 mL  
237 conical flask with stopper, respectively. Then, the fruit peels were extracted with 10  
238 mL of ACN for 5 min under ultrasonication, respectively. The extract was centrifuged  
239 at  $6790 \times g$  for 10 min, and the supernatant was filtered through 0.22  $\mu\text{m}$  microporous  
240 membrane and stored at 4°C before analysis.

#### 241 **MALDI-TOF-MS analysis**

242 All MALDI-TOF-MS measurements were performed on an MALDI-7090 (Shimadzu

Scientific Instruments, Kyoto, Japan) equipped with a pulsed nitrogen laser (355 nm) in reflection and positive ion mode. The main parameters are as follows: raster type, regular circle; profiles, 100 profiles; accumulate, 50 laser shots fired at 50 Hz. A polished-steel sample target with 384 spots was employed and laser intensity was adjusted to 40%.

For the direct analysis using MOF@HOF as a matrix. The 100  $\mu$ L of MOF@HOF solution (2 mg/mL) was added into a 2-mL centrifuge tube containing 900  $\mu$ L of tested sample solution. After ultrasonic dispersion for 5 min, 1  $\mu$ L of the solution was dropped onto the MALDI stainless steel plate and dried at room temperature for MALDI-TOF-MS analysis. On the other hand, for the enrichment treatment using MOF@HOF as an adsorbent before MS analysis. The 100  $\mu$ L of MOF@HOF solution (2 mg/mL) was added into a 2-mL centrifuge tube containing 900  $\mu$ L of tested sample solution and shaken on a temperature-controlled air bath shaker (SHZ-82, Jintan Zhengrong Experimental Instrument Factory, Jiangsu, China) at 150 rpm for 25 min under 40°C to acquire adequate adsorption. Then, the material was separated by centrifugation at 6790  $\times g$  for 5 min and re-dispersed in 50  $\mu$ L ACN under ultrasonication. Finally, 1  $\mu$ L of the solution was dropped onto the MALDI stainless steel plate and dried at room temperature for MALDI-TOF-MS analysis.

#### **Section of pericarp tissue and MALDI-MSI analysis**

Fresh samples of kumquat and honey orange were stored at -20°C. For the analysis of distribution of flavonoids in peel tissue, peels of fruits were cut into 18  $\mu$ m slices using a LEICA CM1950 freezing microtome (LEICA Microsystems GmbH, Intertzlar, Germany) at -20°C. MSI analysis was performed on an UltrafleXtreme MALDI TOF/TOF MS (Bruker Daltonics, USA) equipped with a frequency tripled Nd: YAG solid-state laser (355 nm). Tissue sections were analyzed in positive reflection ion mode with 100 laser shots fired at 1000.0 Hz. MSI data was analyzed using FlexAnalysis 3.4 and FlexImaging 4.1 (Bruker Daltonics).

## 271 **Supplementary Results**

272 To meet the requirement of adsorption kinetics and isotherm experiments test, a HPLC  
273 method of a wide linear range (12.5–200.0 µg/mL) was developed. Fig. S4 shows the  
274 fitting curves of three flavonoids and Table S2 shows the analytical performance  
275 parameters of the method, the relatively high correlation coefficient ( $R^2 \geq 0.9991$ ) were  
276 obtained within the tested range. The LODs and LOQs are in the ranges of 6.9–10.3  
277 ng/mL and 20.7–30.9 ng/mL, respectively. The RSDs of intra- and inter-day  
278 repeatability are in the range of 0.8%–1.6%, 1.9%–2.5%, respectively.

279 To evaluate the adsorption properties of the material, adsorption kinetics and  
280 isotherm experiments were carried out. The adsorption isotherms for adsorbent to  
281 flavonoids at room temperature are shown in Fig. S5a. The adsorption capacity  
282 continuously increased with increasing initial concentration at the beginning of  
283 adsorption process, thereafter, the adsorption capacity achieved saturation when the  
284 initial concentrations of flavonoids were 200 µg/mL. The highest adsorption capacity  
285 of the adsorbent to NAR, HES, and TAN were obtained to be 11.8, 18.5, and 29.0 mg/g,  
286 respectively. To further study the binding properties, the Langmuir and Freundlich  
287 models were selected to fit the obtained experimental data. As expected, the Langmuir  
288 model equation is much better for modeling the isotherm adsorption than the Freundlich  
289 model equation (Fig. S6, Table S3), which can be concluded that the recognition sites  
290 are uniformly distributed in a monolayer on the adsorbent surface. The adsorption  
291 kinetic curves for adsorbent to flavonoids of different adsorption time are shown in Fig.  
292 S5b. The adsorption capacity of adsorbent increased gradually with time and reached  
293 equilibrium at 25 min. The fast equilibrium may be related to the high specific surface  
294 area and high porosity of the material. The results revealed that the adsorption of  
295 flavonoids on MOF@HOF can quickly reach an adsorption equilibrium with a  
296 satisfactory adsorption capacity.

297

## 298 **Reference**

299 [1] S. J. Yin, X. Wang, H. Jiang, M. Lu, X. Zhou, L. X. Li, F. Q. Yang, *Anal. Bioanal.*

300 *Chem.*, 2021, **413**, 6987–6999.

301 [2] J. Guo, Y. Wan, Y. F. Zhu, M. T. Zhao, Z. Y. Tang, *Nano Res.*, 2021, **14**,

302 2037–2052.

303 [3] R. Bibi, H. L. Huang, M. Kalulu, Q. H. Shen, L. F. Wei, O. Oderinde, N. X. Li, J.

304 C. Zhou, *ACS Sustain Chem Eng.*, 2019, **7**, 4868-4877.

305 [4] Z. J. Zhang, S. K. Xian, H. X. Xi, H. H. Wang, Z. Li, *Chem. Eng. Sci.* 2011, **66**,

306 4878–4888.

307 [5] J. Tang, R. R. Salunkhe, J. Liu, N. L. Torad, M. Imura, S. Furukawa, Y. Yamauchi,

308 *J. Am. Chem. Soc.*, 2015, **137**, 1572–1580.

309

310

**Table S1.** Method validation using MOF@HOF as a matrix for the direct analysis of three flavonoids by MALDI-TOF-MS

| Analytes | Regressive curves | Liner range<br>( $\mu\text{g}\cdot\text{mL}^{-1}$ ) | $R^2$  | LOD<br>( $\mu\text{g/mL}$ ) | LOQ<br>( $\mu\text{g/mL}$ ) | RSD (%)<br>( $n=6$ ) |
|----------|-------------------|-----------------------------------------------------|--------|-----------------------------|-----------------------------|----------------------|
| NAR      | $Y=4.32X+84.22$   | 25–200                                              | 0.9986 | 7.0                         | 23.4                        | 11.1                 |
| HES      | $Y=5.62X+156.11$  | 25–200                                              | 0.9993 | 5.3                         | 17.8                        | 9.9                  |
| TAN      | $Y=45.19X+412.72$ | 25–200                                              | 0.9968 | 1.1                         | 3.7                         | 7.8                  |

HES, hesperetin; NAR, naringenin; TAN, tangeretin.

**Table S2.** Analytical performance for the determination of the investigated flavonoids by the developed HPLC method

| Analytes | Regressive curves | Liner range<br>( $\mu\text{g}\cdot\text{mL}^{-1}$ ) | $R^2$  | LOD<br>( $\text{ng/mL}$ ) | LOQ<br>( $\text{ng/mL}$ ) | Intra-day<br>RSD (%) ( $n=6$ ) | Inter-day<br>RSD (%) ( $n=6$ ) |
|----------|-------------------|-----------------------------------------------------|--------|---------------------------|---------------------------|--------------------------------|--------------------------------|
| NAR      | $Y=91.63X+235.63$ | 12.5–200.0                                          | 0.9991 | 10.3                      | 30.9                      | 1.6                            | 2.0                            |
| HES      | $Y=76.61X+111.69$ | 12.5–200.0                                          | 0.9998 | 8.2                       | 24.7                      | 1.4                            | 1.9                            |
| TAN      | $Y=70.31X+59.62$  | 12.5–200.0                                          | 0.9999 | 6.9                       | 20.7                      | 0.8                            | 2.5                            |

HES, hesperetin; NAR, naringenin; TAN, tangeretin.

**Table S3.** The linear relationship and parameters of Langmuir and Freundlich adsorptions

| Compounds | Langmuir            |                                |                                 |                | Freundlich          |                                                |                 |                |
|-----------|---------------------|--------------------------------|---------------------------------|----------------|---------------------|------------------------------------------------|-----------------|----------------|
|           | Regressive equation | $Q_m$<br>(mg g <sup>-1</sup> ) | $K_l$ (mL<br>mg <sup>-1</sup> ) | R <sup>2</sup> | Regressive equation | $K_f(mg^{1-\frac{1}{n}}L^{\frac{1}{n}}g^{-1})$ | $\frac{1}{n}$ a | R <sup>2</sup> |
| TAN       | Y=0.259X+0.067      | 30.3                           | 0.04                            | 0.996          | Y=2.015X-1.622      | 0.02                                           | 2.015           | 0.824          |
| HES       | Y=0.647X+0.055      | 18.2                           | 0.09                            | 0.998          | Y=2.073X-1.133      | 0.07                                           | 2.073           | 0.763          |
| NAR       | Y=0.746X+0.033      | 14.9                           | 0.26                            | 0.998          | Y=2.035X+0.162      | 1.45                                           | 2.035           | 0.916          |

**a:**  $0.1 < 1/n \leq 0.5$  represented that the adsorption is very easy to perform;  $0.5 < 1/n \leq 1$  represented that the adsorption is easy to perform;  $1 > 1/n$  represented that the adsorption is difficult to perform. **HES**, hesperetin; **NAR**, naringenin; **TAN**, tangeretin.

**Table S4.** Method validation using MOF@HOF as an adsorbent and matrix for the analysis of three flavonoids by MALDI-TOF-MS

| <b>Analytes</b> | <b>Regressive curves</b> | <b>Liner range<br/>(ng·mL<sup>-1</sup>)</b> | <b>R<sup>2</sup></b> | <b>LOD<br/>(ng/mL)</b> | <b>LOQ<br/>(ng/mL)</b> | <b>RSD (%)<br/>(n=6)</b> |
|-----------------|--------------------------|---------------------------------------------|----------------------|------------------------|------------------------|--------------------------|
| NAR             | Y=11.31X+150.51          | 10–100                                      | 0.9926               | 2.7                    | 9.0                    | 10.9                     |
| HES             | Y=19.34X+109.09          | 10–100                                      | 0.9964               | 2.0                    | 6.7                    | 7.5                      |
| TAN             | Y=147.66X+545.31         | 10–100                                      | 0.9936               | 0.3                    | 1.1                    | 4.3                      |

**Table S5.** Determination of three flavonoids in kumquat and honey orange by MALDI-TOF-MS using MOF@HOF as an adsorbent and matrix

| Sample       | Real content (ng mL <sup>-1</sup> ) |      |      | Spiked level<br>(ng mL <sup>-1</sup> ) | Found (ng mL <sup>-1</sup> ) |          |          | Recovery (%) |          |           |
|--------------|-------------------------------------|------|------|----------------------------------------|------------------------------|----------|----------|--------------|----------|-----------|
|              | NAR                                 | HES  | TAN  |                                        | NAR                          | HES      | TAN      | NAR          | HES      | TAN       |
| Kumquat      | 10.1                                | -    | 18.7 | 20                                     | 29.8±1.1                     | 16.4±0.7 | 35.5±2.5 | 99.2±3.5     | 82.2±3.3 | 91.7±6.5  |
|              |                                     |      |      | 50                                     | 55.6±2.0                     | 47.0±1.9 | 65.4±4.6 | 92.5±3.4     | 94.1±3.9 | 95.2±6.7  |
|              |                                     |      |      | 80                                     | 86.9±1.6                     | 75.3±1.6 | 95.8±2.6 | 96.4±1.7     | 94.2±2.1 | 97.1±2.6  |
| Honey orange | -                                   | 15.7 | 10.5 | 20                                     | 17.2±1.2                     | 31.6±1.0 | 28.1±3.0 | 86.2±6.0     | 88.5±2.7 | 92.2±9.8  |
|              |                                     |      |      | 50                                     | 45.9±1.9                     | 62.0±1.2 | 61.3±2.7 | 91.9±3.8     | 94.4±1.8 | 101.4±4.5 |
|              |                                     |      |      | 80                                     | 75.8±2.0                     | 84.4±4.9 | 89.1±4.2 | 94.8±2.6     | 88.2±5.1 | 98.4±4.7  |

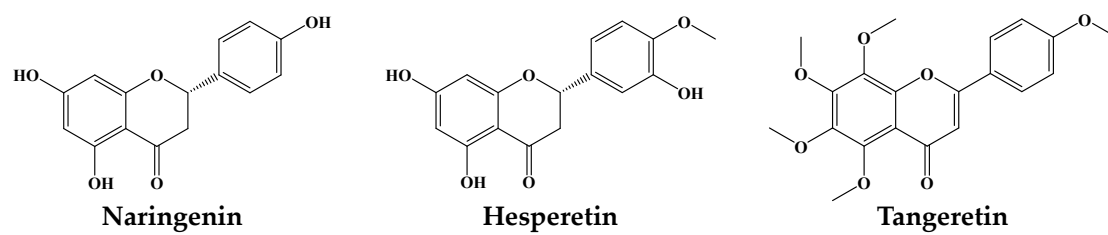

**Fig. S1.** Chemical structures of selected flavonoids.

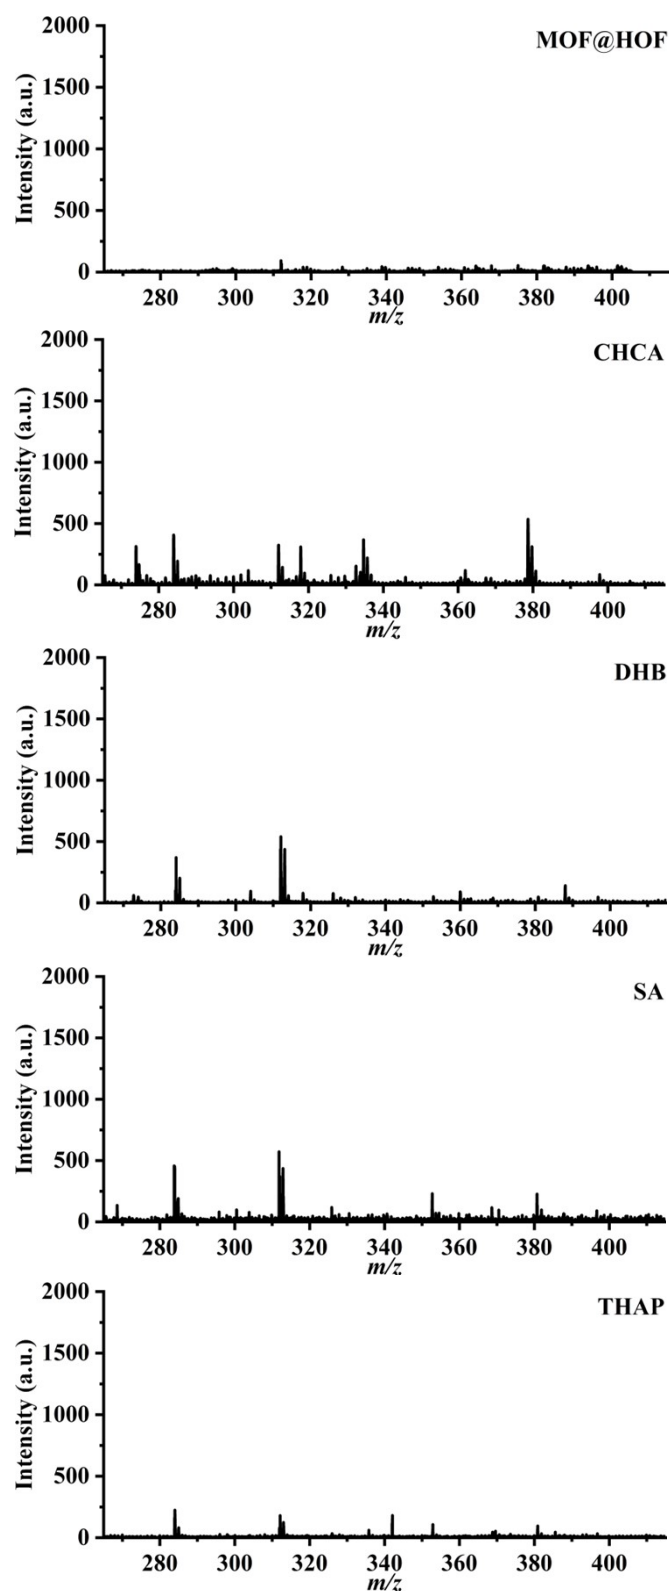

**Fig. S2.** The background mass spectra of MOF@HOF composite and traditional matrix. **CHCA**,  $\alpha$ -cyano-4-hydroxycinnamic acid; **DHB**, 2, 5-dihydroxybenzoic acid; **MOF@HOF**, metal-organic framework @ hydrogen-bond framework; **SA**, sinapic acid; **THAP**, 2, 4, 6-trihydroxyacetophenone.

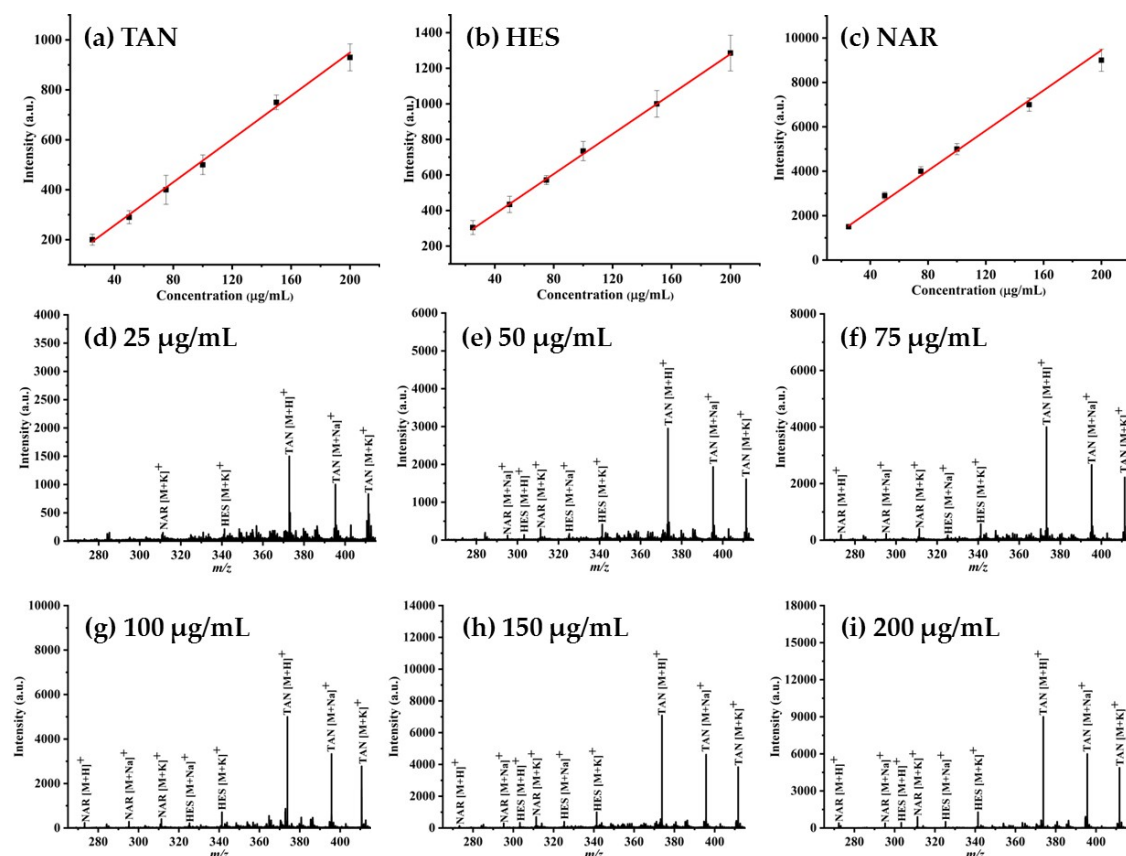

**Fig. S3.** The calibration curves of (a) TAN, (b) HES, and (c) NAR using MOF@HOF as a matrix for the direct MALDI-TOF-MS analysis, based on the intensity of TAN ( $[M+H]^+$  at  $m/z$  373), HES ( $[M+K]^+$  at  $m/z$  341), and NAR ( $[M+K]^+$  at  $m/z$  311); (d–i) Mass spectra of mixed reference compounds in the concentrations of 25–200 μg/mL. HES, hesperetin; NAR, naringenin; TAN, tangeretin.

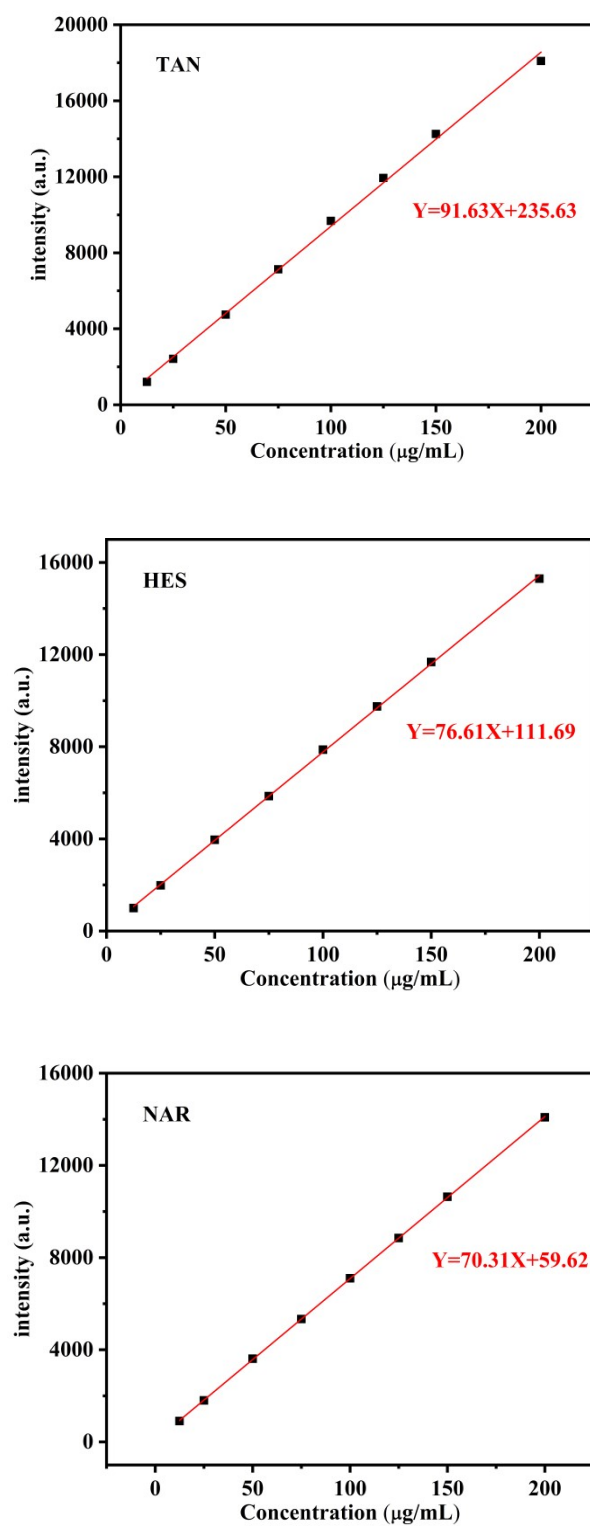

**Fig. S4.** The calibration curves of investigated flavonoids determined by HPLC using MOF@HOF as an adsorbent. **HES**, hesperetin; **NAR**, naringenin; **TAN**, tangeretin.

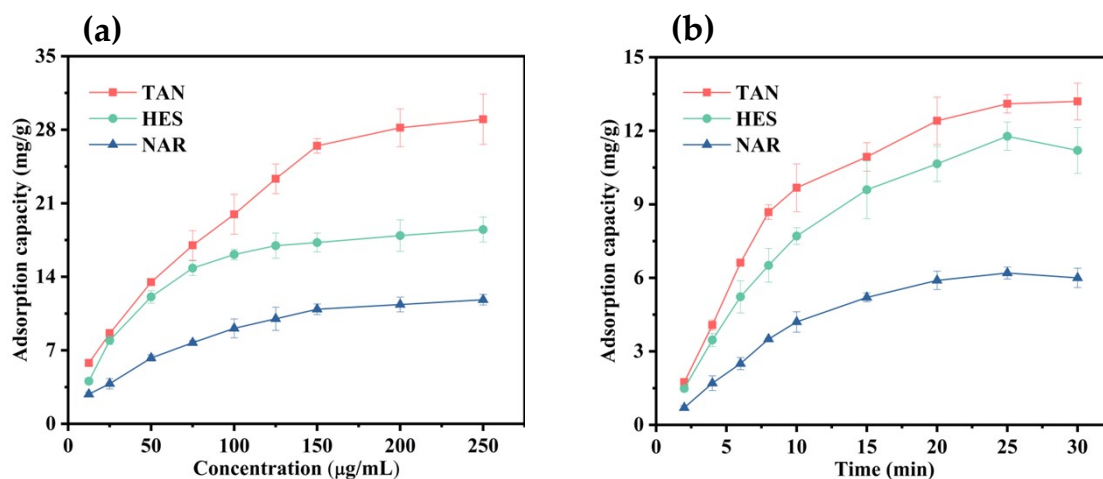

**Fig. S5.** (a) Adsorption isotherms and (b) adsorption kinetics of TAN, HES, and NAR using MOF@HOF as an adsorbent. TAN, tangeretin; HES, hesperetin; NAR, naringenin.

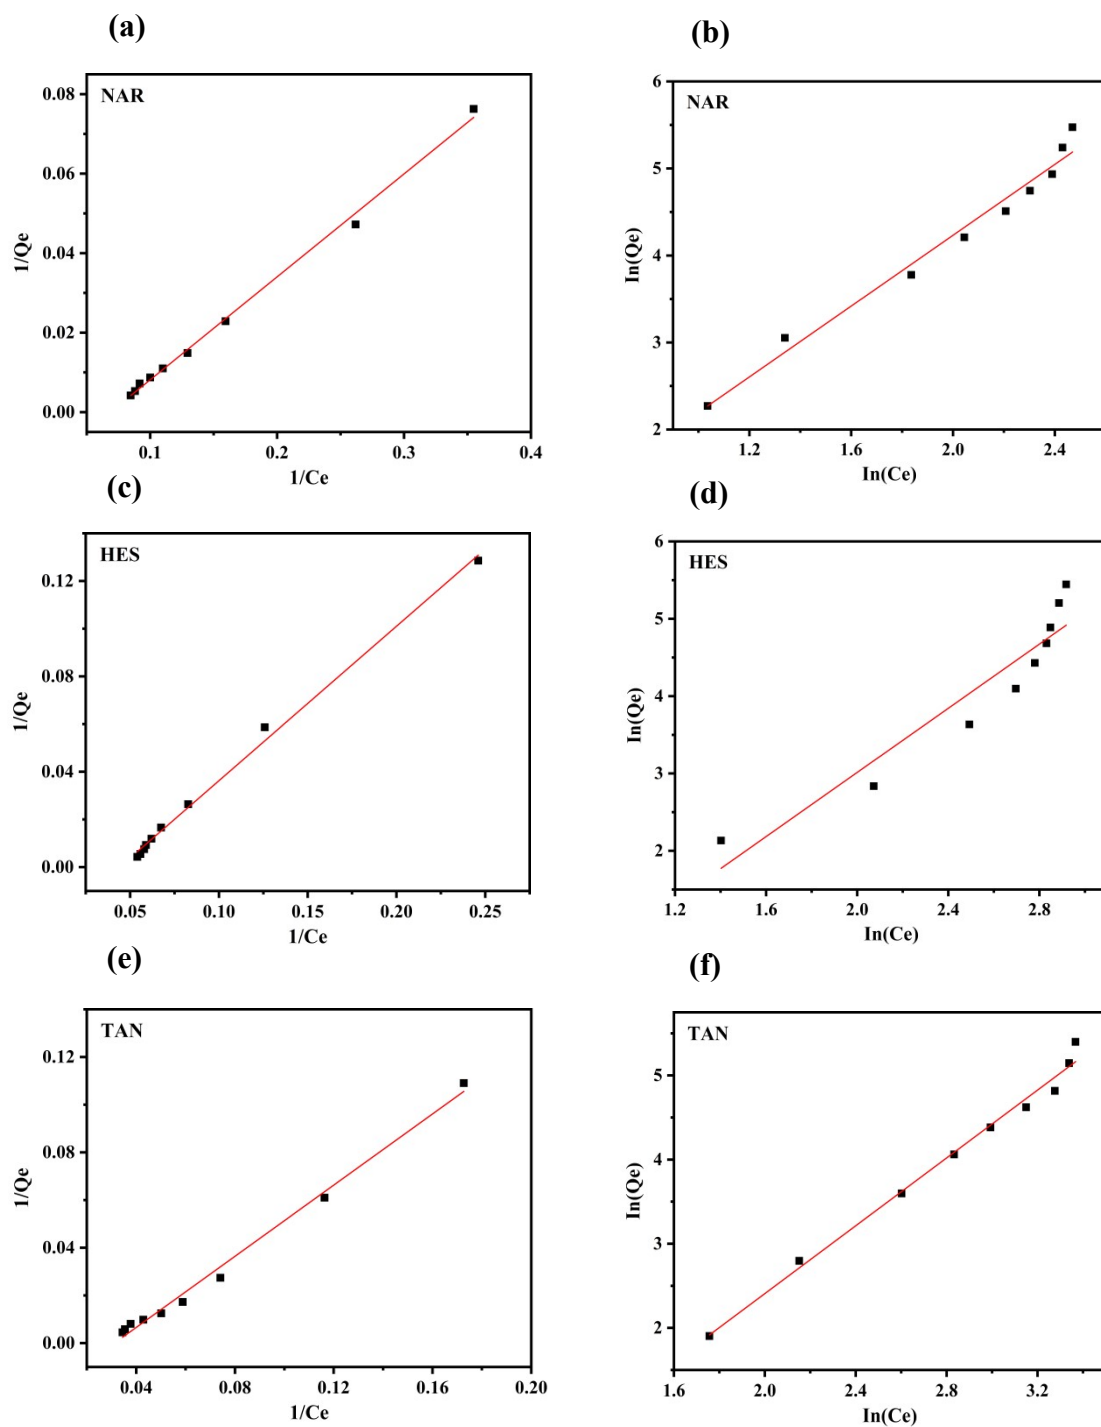

**Fig. S6.** Langmuir (a, c, e) and Freundlich (b, d, f) isotherm adsorption model curves of three flavonoids. **HES**, hesperetin; **NAR**, naringenin; **TAN**, tangeretin.

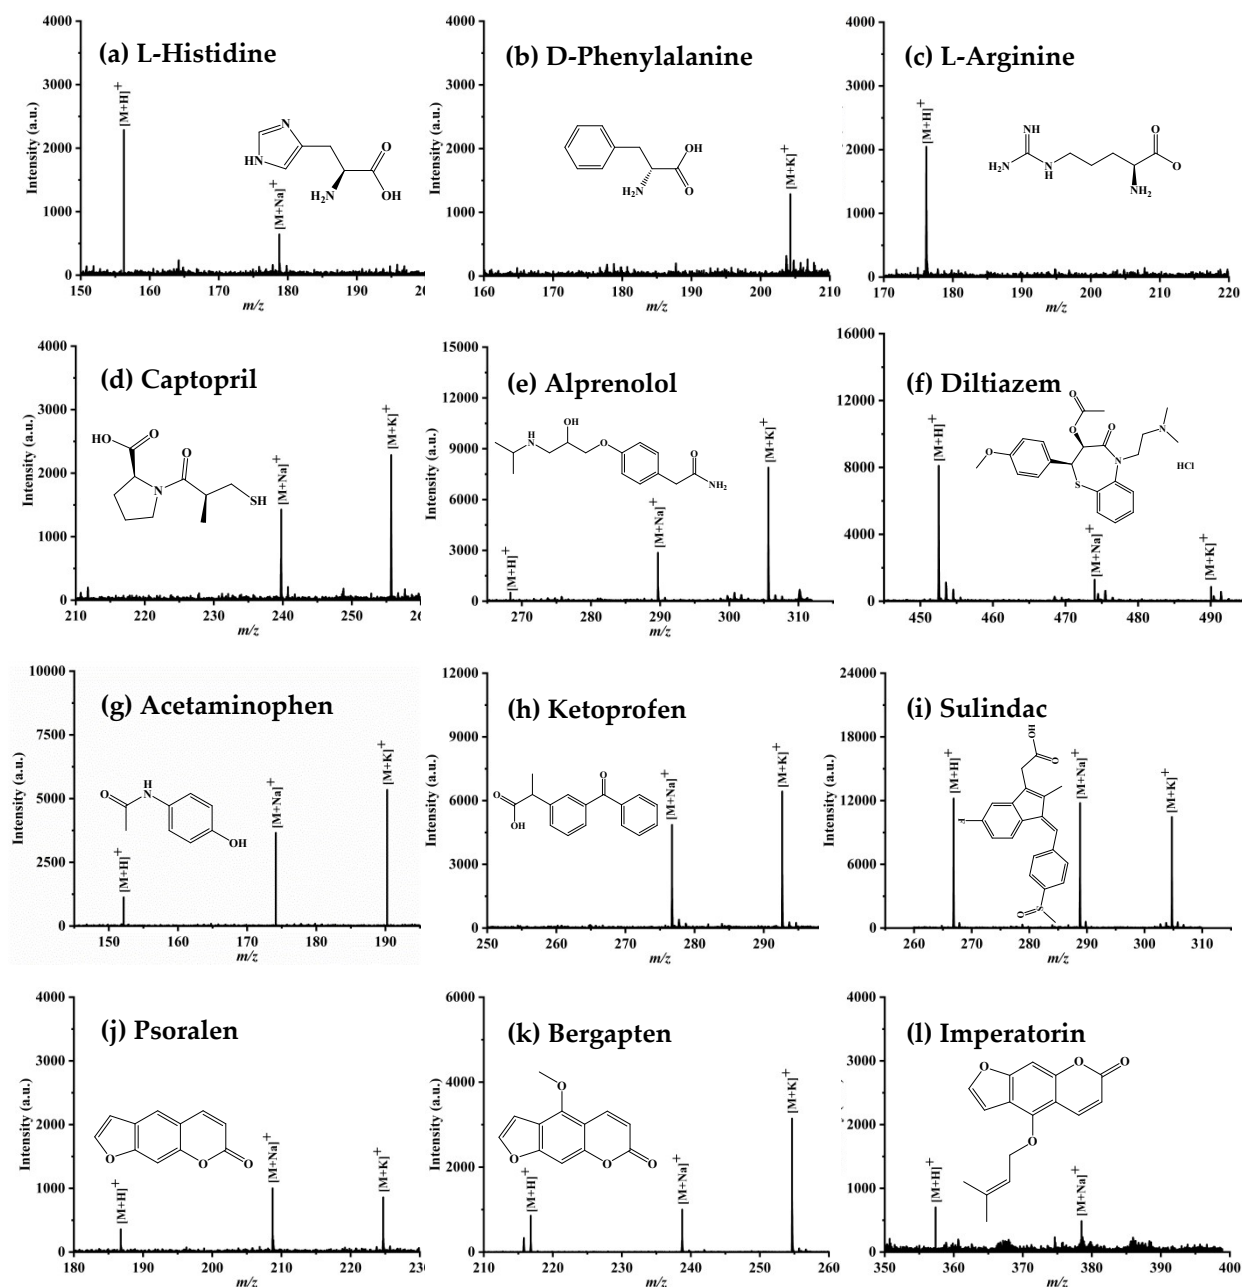

**Fig. S7.** Mass spectra and corresponding chemical structures of amino acids ((a) L-histidine, (b) D-phenylalanine, and (c) L-arginine), antihypertensive drugs ((d) captopril, (e) alprenolol, and (f) diltiazem), non-steroid anti-inflammatory drug ((g) acetaminophen, (h) ketoprofen, and (i) sulindac), coumarins ((j) psoralen, (k) bergapten, and (l) imperatorin). The amino acids were dissolved in ultrapure water and the other compounds were dissolved in acetonitrile. The concentration of all analytes is 100  $\mu\text{g/mL}$  for direct analysis.

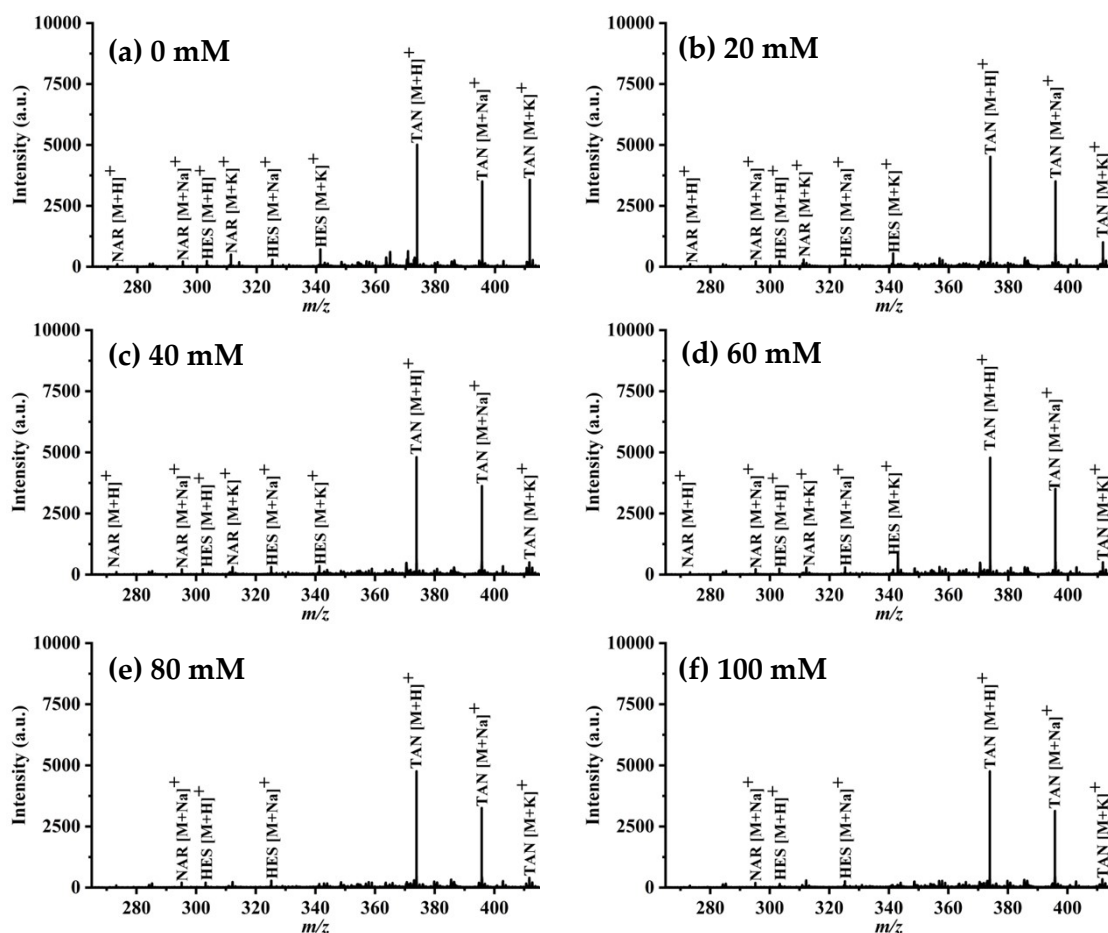

**Fig. S8.** MALDI-TOF-MS spectra of 100  $\mu\text{g/mL}$  of tangeretin analyzed using MOF@HOF as a matrix in positive ion mode with addition of 0, 20, 40, 60, 80, and 100 mM of NaCl.

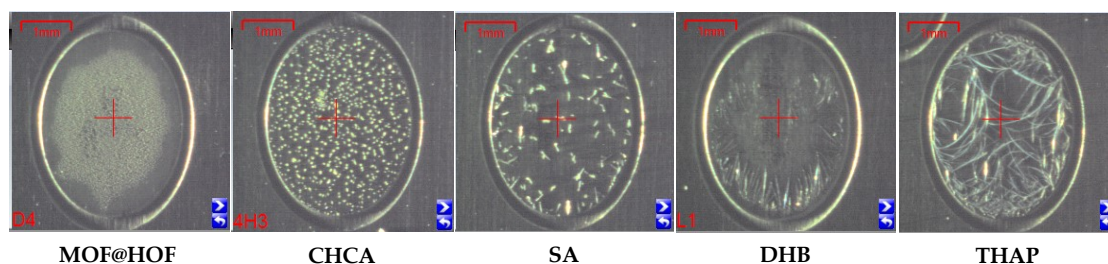

**Fig. S9.** Optical images of different matrix (2 mg/mL) dispersed on the stainless-steel targets. **CHCA**,  $\alpha$ -cyano-4-hydroxycinnamic acid; **DHB**, 2, 5-dihydroxybenzoic acid; **MOF@HOF**, metal-organic framework @ hydrogen-bond framework; **SA**, sinapic acid; **THAP**, 2, 4, 6-trihydroxyacetophenone.

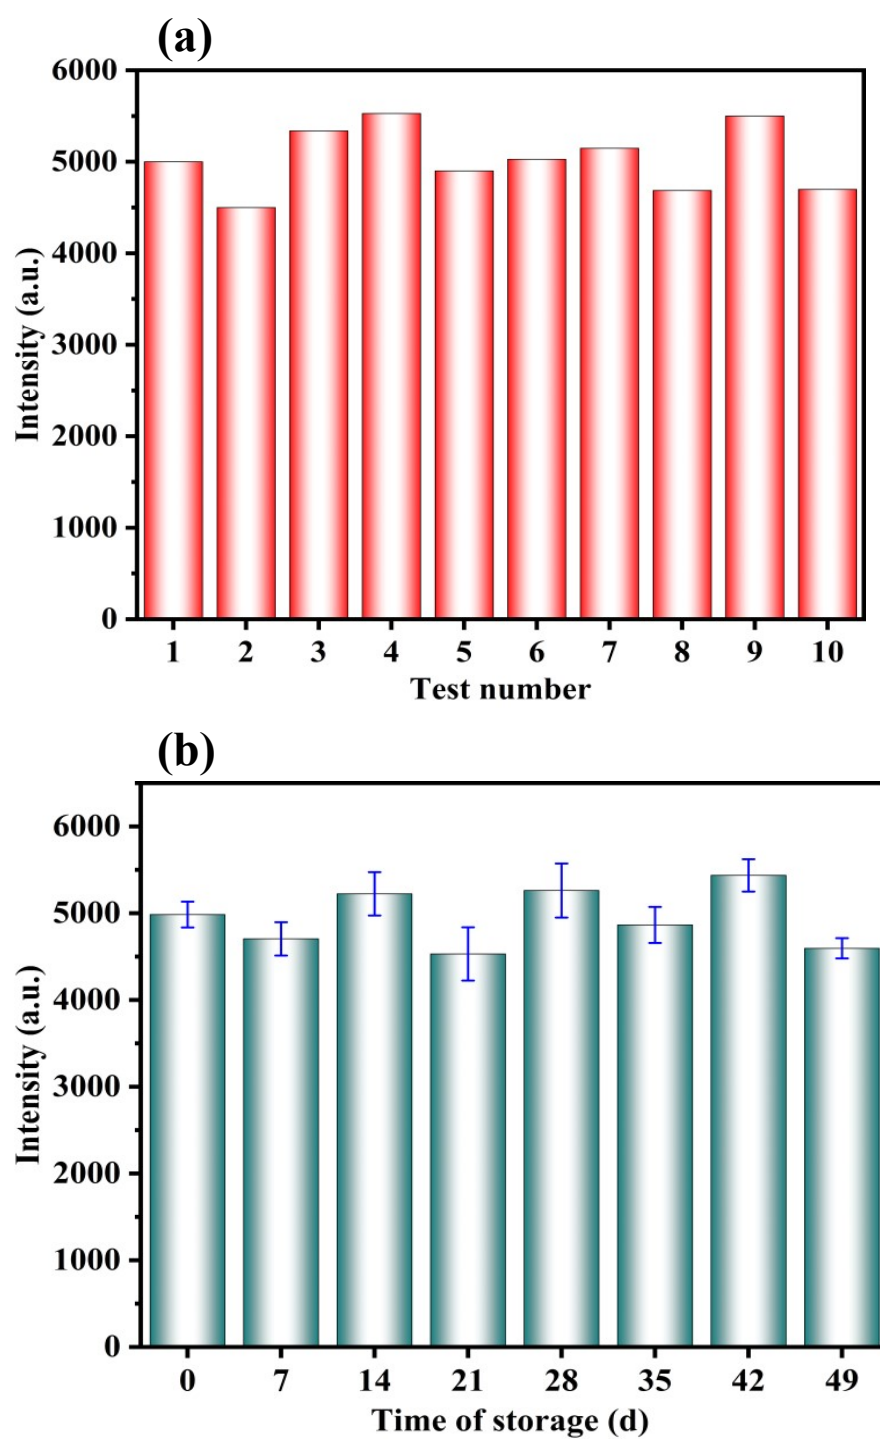

**Fig. S10.** (a) Repeatability and (b) storage stability test of MOF@HOF composite, based on the intensity of tangeretin ([M+H]<sup>+</sup> at *m/z* 373).

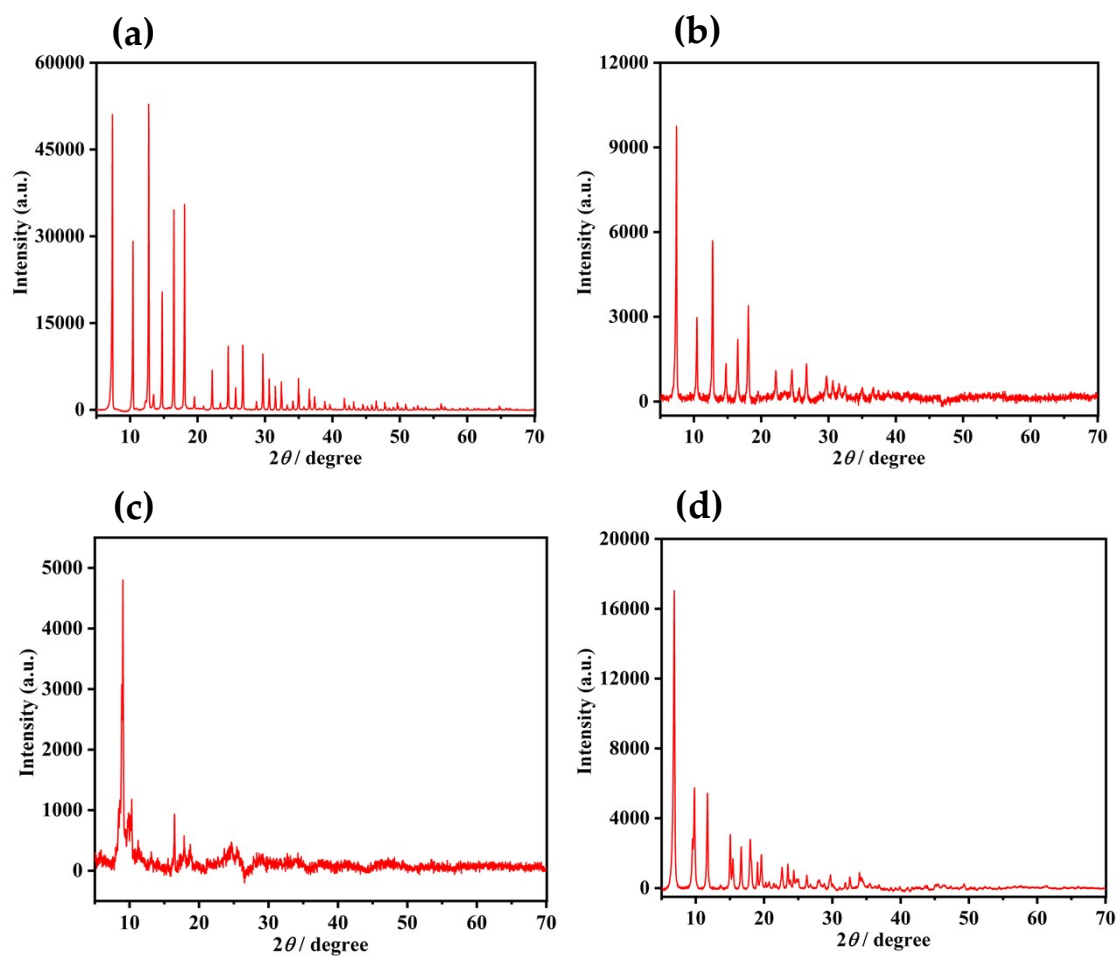

**Fig. S11.** The XRD spectra of (a) ZIF-8, (b) ZIF-67, (c) NH<sub>2</sub>-MIL-101, and (d) NH<sub>2</sub>-MIL-125.

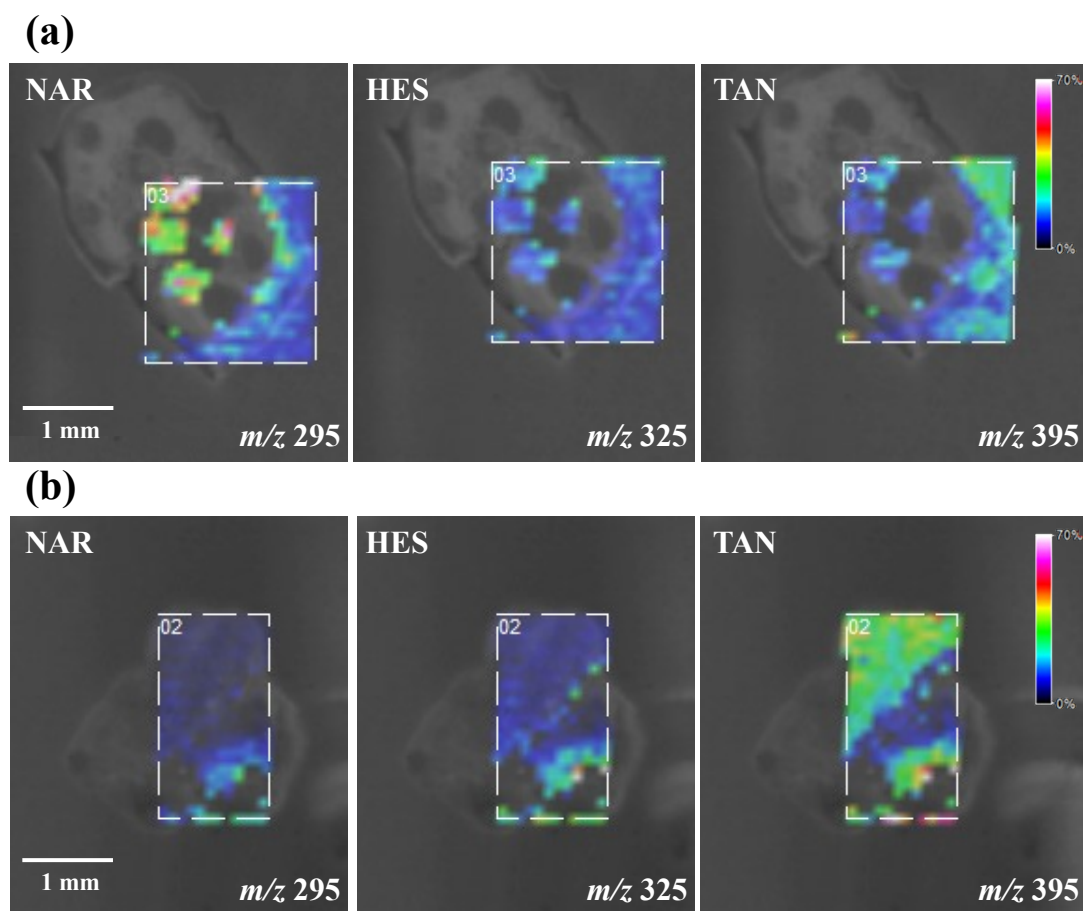

**Fig. S12.** MALDI-MS imaging analysis of the NAR, HES, and TAN distribution in the peel tissue of **(a)** kumquat and **(b)** honey orange. TAN, tangeretin; HES, hesperetin; NAR, naringenin.
